# Supplementary material
Source: PubMed Central journal article supplement (PMC1172267)
Supplement: pnas_0503887102_1.pdf [file pnas_0503887102_1.pdf]

## Supporting Appendix

Contains an outline of our notation scheme and statistical calculations.

### I. Data

#### I.1. Color systems

$\mathbf{M} = (m_{1j}, m_{2j}, m_{3j})$  : coordinates of Munsell chip ( $H_j V_j/C_j$ ) [1]

on the following Cartesian coordinate axes

Axis-1 represents  $V$ , white (top) to black (bottom)

Axes-2 and -3 are vertical and horizontal axes in  $(H, C)$  plane,

Axis-2 (R/BG): 5R (top) to 5BG (bottom)

Axis-3 (Y/PB): 10Y (right) to 10PB (left)

$\mathbf{L} = (L^*_j, a^*_j, b^*_j)$  : the Commission International de l'Eclairage 1976  $L^*a^*b^*$   
color space (1) [2]

#### I.2. Matrices and a vector on spectrum, $\mu$ is code number representing a wavelength $\lambda$

$\mathbf{S} = (s_{j\mu})$  : spectral reflectance of Munsell chips  $j$  [3]

$\mathbf{E} = (e_\mu)$  : spectral power distribution of standard illumination D65 [4]

$\mathbf{C} = (c_{q\mu})$  : spectral sensitivities of cones  $q$ ,  $q = L, M, S$ , [5]

Stockman and Sharp (2)

$\mathbf{G} = (g_{j\mu})$  : excitation of lateral geniculate nucleus cells  $j$  caused by monochromatic light  $\mu$ , De Valois et al. (3) [6]

II. Two plots in Fig.2

target  $\mathbf{Z} = (z_{j\mu})$  [7]

regression of  $\mathbf{Z}$  on  $\mathbf{C}$   $\mathbf{Z} \approx \hat{\mathbf{Z}} = (\hat{z}_{j\mu})$

$$\hat{z}_{j\mu} = a_j + \sum_q b_{jq} c_{q\mu}^{0.33}, \quad q = L, M, S \quad [8]$$

normalization

$$B_{jq} = \frac{b_{jq}}{\sum_q |b_{jq}|} \quad [9]$$

plots:  $(B_{jM}, B_{jL})$

II.1. Right B: in Eq. 7,  $z_{j\mu} = s_{j\mu} e_\mu$

Munsell chips  $j = 1 - 1,269$ ,  $\mu = 1 - 12$  ( $\lambda = 420 \sim 670\text{nm}$ )

II.2. Left A: in Eq. 7,  $z_{j\mu} = ((\text{sum of } g_{j\mu} \text{ of 3 intensity levels}) e_\mu)$

LGN cells  $j = 1 - 147$ ,  $\mu = 1 - 12$  ( $\lambda = 420 \sim 670\text{nm}$ )

III. Fig. 4

( $B_{jq}$ ) in II.1 ( $j = 1 - 1,269$ ,  $q = L, M, S$ ),  $j$  is changed to (H V/C)

( $B(H V/C)_q$ ), [10]

$H = 2.5, 5, 7.5, 10$  H,  $H=R, YR, Y, GY, G, BG, B, PB, P, RP$

$V = 2, 2.5, 3, 4, 5, 6, 7, 8, 8.5, 9$

$C = 2, 4, 6, 8$

$q = L, M, S$

Sums of cone coefficients =  $\sum_{V,C} |B(HV/C)_q|$

Means = mean (over V,C) of  $B(H V/C)_q$

IV. Fig. 5

A: plot of ( $m_{2j}$ ,  $m_{3j}$ ) of  $\mathbf{M}$  in Eq. 1

B, C, D:

Regression  $\mathbf{M}$  on  $\mathbf{X}$ :  $\mathbf{M} \approx \hat{\mathbf{M}} = (\hat{m}_{\alpha j})$ ,  $\alpha = 1, 2, 3$ ,  $j = 1 - 1,269$

$$\hat{m}_{\alpha j} = a_{\alpha} + \sum_k b_{\alpha k} x_{\alpha k} \quad [11]$$

plot:  $(\hat{m}_{2j}, \hat{m}_{3j})$

B:  $\mathbf{X} = (L^*_k, a^*_k, b^*_k)$  in Eq. 2,  $k = 1 - 1,269$

C:  $\mathbf{X} = (x_{qk})$ ,  $q = L, M, S$ , Munsell chips  $k = 1 - 1,269$

$$x_{qk} = \sum_{\mu} (s_{k\mu} e_{\mu} c_{q\mu})^{0.33}, \quad \mu = 1 - 12 \quad (\lambda = 420 \sim 670\text{nm})$$

D:  $\mathbf{X} = (x_{qk})$ ,  $q = L, M, S$ , LGN cells  $k = 1 - 441$  (147 by three intensity levels)

$$x_{qk} = \sum_{\mu} (g_{k\mu} e_{\mu} c_{q\mu})^{0.33} \quad g_{k\mu} \text{ in } \mathbf{G} \text{ Eq. 6, } \mu = 1 - 12 \quad (\lambda = 420 \sim 670\text{nm})$$

1. Wyszecki, G. & Stiles, W. S. (1982) *Color Science: Concepts and Methods, Quantitative Data and Formulae*, 2nd edition. (Wiley, New York), p. 168.
2. Stockman, A. & Sharpe, L. T. (2000) *Vision Res.* **40**, 1711–1737.
3. De Valois, R. L., Abramov, I., & Jacobs, G. H. (1966) *J. Opt. Soc. Am.* **56**, 966–977.
